# Supplementary material for: Prevalence and predictors of work-related musculoskeletal disorders among healthcare professionals in Sub-Saharan African region: systematic review and meta-analysis protocol
Source: Research Square preprint supplement (doi:10.21203/rs.3.rs-3312872/v1), 2023-09-25
Supplement: Supplementary file 1 [file 2f85cbfd352359cd4f2a5fc7.docx]

S 12 Table A. Detailed Newcastle-Ottawa Scale for each included study in the meta-analysis.

| Study | Selection | | | | | Comparability | | Exposure | | Q S |
| --- | --- | --- | --- | --- | --- | --- | --- | --- | --- | --- |
| First authors and years | Representativeness of the sample | Sampling technique | Sample size | Inclusion criteria stated | Scope of the study defined | Assessed for risk  factors | Compared risk factors among study groups | Assessment of outcome | Statistical test |  |
|  |  |  |  |  |  |  |  |  |  |  |
|  |  |  |  |  |  |  |  |  |  |  |
|  |  |  |  |  |  |  |  |  |  |  |
|  |  |  |  |  |  |  |  |  |  |  |
|  |  |  |  |  |  |  |  |  |  |  |
|  |  |  |  |  |  |  |  |  |  |  |
|  |  |  |  |  |  |  |  |  |  |  |
|  |  |  |  |  |  |  |  |  |  |  |
|  |  |  |  |  |  |  |  |  |  |  |
|  |  |  |  |  |  |  |  |  |  |  |
|  |  |  |  |  |  |  |  |  |  |  |
|  |  |  |  |  |  |  |  |  |  |  |
|  |  |  |  |  |  |  |  |  |  |  |
|  |  |  |  |  |  |  |  |  |  |  |
|  |  |  |  |  |  |  |  |  |  |  |
|  |  |  |  |  |  |  |  |  |  |  |
|  |  |  |  |  |  |  |  |  |  |  |
|  |  |  |  |  |  |  |  |  |  |  |
|  |  |  |  |  |  |  |  |  |  |  |
|  |  |  |  |  |  |  |  |  |  |  |
|  |  |  |  |  |  |  |  |  |  |  |
|  |  |  |  |  |  |  |  |  |  |  |
|  |  |  |  |  |  |  |  |  |  |  |
| Mutagoma et al., 2017 | 0 | 0 | 1 | 1 | 1 | 1 | 1 | 1 | 1 | 7 |
| Ng’wamkai et al., 2019 | 0 | 0 | 1 | 1 | 1 | 1 | 1 | 1 | 1 | 7 |
| Ngaira et al., 2016 | 0 | 0 | 1 | 1 | 1 | 1 | 1 | 1 | 1 | 7 |
| Ochola et al., 2013 | 1 | 1 | 1 | 1 | 1 | 0 | 0 | 1 | 1 | 7 |
| Pirillo et al., 2007 | 0 | 0 | 1 | 1 | 1 | 0 | 0 | 1 | 1 | 5 |
| Rachel et al., 2018 | 0 | 0 | 1 | 1 | 1 | 1 | 1 | 1 | 1 | 7 |
| Rashid S et al., 2014 | 0 | 0 | 1 | 1 | 1 | 0 | 0 | 1 | 1 | 5 |
| Rusine et al., 2013 | 0 | 0 | 1 | 1 | 1 | 1 | 1 | 1 | 1 | 7 |
| Seremba E, et al., 2017 | 0 | 0 | 1 | 1 | 1 | 1 | 1 | 1 | 1 | 7 |
| Shao R, et al., 2018 | 0 | 0 | 1 | 1 |  | 1 | 1 | 1 | 1 | 7 |
| Telatela SP et al., 2007 | 0 | 0 | 1 | 1 | 1 | 0 | 0 | 1 | 1 | 5 |
| Twagirumugabe et al., 2017 | 0 | 0 | 1 | 1 | 1 | 1 | 1 | 1 | 1 | 7 |
| Umutesi et al., 2017 | 0 | 0 | 1 | 1 | 1 | 0 | 0 | 1 | 1 | 5 |
| Ziraba et al., 2010 | 0 | 0 | 1 | 1 | 1 | 1 | 1 | 1 | 1 | 7 |
