# Supplementary material for: Prevalence and predictors of work-related musculoskeletal disorders among healthcare professionals in Sub-Saharan African region: systematic review and meta-analysis protocol
Source: Research Square preprint supplement (doi:10.21203/rs.3.rs-3312872/v1), 2023-09-25
Supplement: Supplementary file 2 [file 3548452dd7bf7610ef5c9958.doc]

**PRISMA-P (Preferred Reporting Items for Systematic review and Meta-Analysis Protocols) 2015 checklist: recommended items to address in a systematic review protocol***

**Study protocol:** Prevalence and predictors of work-related musculoskeletal disorders among healthcare professionals in Sub-Saharan African region: A study protocol for extending a systematic review and meta-analysis of observational studies.

| Section and topic | Item No | Checklist item | Reported on page # |
| --- | --- | --- | --- |
| ADMINISTRATIVE INFORMATION | | | |
| Title: |  |  |  |
| Identification | 1a | Identify the report as a protocol of a systematic review | Stated in the title |
| Update | 1b | If the protocol is for an update of a previous systematic review, identify as such | This a preliminary review |
| Registration | 2 | If registered, provide the name of the registry (such as PROSPERO) and registration number | PROSPERO (Registration number CRD42023455517) |
| Authors: |  |  |  |
| Contact | 3a | Provide name, institutional affiliation, e-mail address of all protocol authors; provide physical mailing address of corresponding author | Corresponding Author  Abdulmujeeb Babatunde Aremu,  [abumujaeed@gmail.com](mailto:abumujaeed@gmail.com)  Department of Public Health, Faculty of Health Science, Habib Medical School, Islamic University in Uganda, Kampala-Uganda.  Other co-authors,  Ismail Bamidele Afolabi2, University of Ottawa, Ottawa, Ontario, Canada.  Owino Alfred Odongo. Mount Kenya University, |
| Contributions | 3b | Describe contributions of protocol authors and identify the guarantor of the review | Mentioned under the section Author’s contributions |
| Amendments | 4 | If the protocol represents an amendment of a previously completed or published protocol, identify as such and list changes; otherwise, state plan for documenting important protocol amendments | This is a study protocol |
| Support: |  |  |  |
| Sources | 5a | Indicate sources of financial or other support for the review | Mentioned under funding section |
| Sponsor | 5b | Provide name for the review funder and/or sponsor | None |
| Role of sponsor or funder | 5c | Describe roles of funder(s), sponsor(s), and/or institution(s), if any, in developing the protocol | NA |
| INTRODUCTION | | |  |
| Rationale | 6 | Describe the rationale for the review in the context of what is already known | Last paragraph of the background section |
| Objectives | 7 | Provide an explicit statement of the question(s) the review will address with reference to participants, interventions, comparators, and outcomes (PICO) | Mentioned under review questions |
| METHODS | | |  |
| Eligibility criteria | 8 | Specify the study characteristics (such as PICO, study design, setting, time frame) and report characteristics (such as years considered, language, publication status) to be used as criteria for eligibility for the review | Mentioned under Eligibility criteria section of methods. |
| Information sources | 9 | Describe all intended information sources (such as electronic databases, contact with study authors, trial registers or other grey literature sources) with planned dates of coverage | Mentioned under **Journal article search strategy** section of methods. |
| Search strategy | 10 | Present draft of search strategy to be used for at least one electronic database, including planned limits, such that it could be repeated | Mentioned under **Journal article search strategy** section of methods. |
| Study records: |  |  |  |
| Data management | 11a | Describe the mechanism(s) that will be used to manage records and data throughout the review | Under data extraction and quality assessment section of methods. |
| Selection process | 11b | State the process that will be used for selecting studies (such as two independent reviewers) through each phase of the review (that is, screening, eligibility and inclusion in meta-analysis) | Mentioned under **methods section** |
| Data collection process | 11c | Describe planned method of extracting data from reports (such as piloting forms, done independently, in duplicate), any processes for obtaining and confirming data from investigators | Under data extraction and quality assessment section of methods. |
| Data items | 12 | List and define all variables for which data will be sought (such as PICO items, funding sources), any pre-planned data assumptions and simplifications | Under methods section |
| Outcomes and prioritization | 13 | List and define all outcomes for which data will be sought, including prioritization of main and additional outcomes, with rationale | Mentioned under the last paragraph of the Discussion |
| Risk of bias in individual studies | 14 | Describe anticipated methods for assessing risk of bias of individual studies, including whether this will be done at the outcome or study level, or both; state how this information will be used in data synthesis | **Mentioned Methodological quality assessment and risk of bias.** |
| Data synthesis | 15a | Describe criteria under which study data will be quantitatively synthesised | Mentioned under **Selection of articles for meta-analysis** |
| 15b | If data are appropriate for quantitative synthesis, describe planned summary measures, methods of handling data and methods of combining data from studies, including any planned exploration of consistency (such as I2, Kendall’s τ) | Detailed analysis methods proposed to be used mentioned under **Statistical analysis** |
| 15c | Describe any proposed additional analyses (such as sensitivity or subgroup analyses, meta-regression) | Detailed analysis methods proposed to be used mentioned under **Statistical analysis** |
| 15d | If quantitative synthesis is not appropriate, describe the type of summary planned | Detailed analysis methods proposed to be used mentioned under **Statistical analysis** |
| Meta-bias(es) | 16 | Specify any planned assessment of meta-bias(es) (such as publication bias across studies, selective reporting within studies) | Detailed analysis methods proposed to be used mentioned under **Statistical analysis** |
| Confidence in cumulative evidence | 17 | Describe how the strength of the body of evidence will be assessed (such as GRADE) | Quality assessment tool attached as additional file 3 |
